# Supplementary material for: Current pharmacologic treatments for smoking cessation and new agents undergoing clinical trials
Source: PubMed Central journal article supplement — Ther Adv Respir Dis. 2019 Sep 19;13:1753466619875925. doi: 10.1177/1753466619875925 (PMC6755639; doi:10.1177/1753466619875925), 2019-09-19
Supplement: Author_Response_to_Reviewer_Comments.pdf [file Author_Response_to_Reviewer_Comments.pdf]

## Author Response to Reviewer Comments

### Response to Reviewer 1 Comments

#### Major

**Point 1: To date, there are several reviews regarding as the efficacy of medications for nicotine use disorder, so you should point out the novelty or new information provided in your review.**

Response 1: We thank the reviewer for this comment and added the following sentence in Introduction : “This review not only describes the latest clinical trials of smoking cessation treatments, but also shows the flow of smoking cessation guidance being conducted in daily practice.”.

**Point 2: The searching strategy is entirely missing in the text. Please add one section to address it. The sentence “we describe the molecular basis of nicotine addiction and review approved drugs and currently investigated clinically relevant agents based on the Cochrane Database of Systemic Reviews, PubMed, Ovid, and Clinical-Trials.gov to aid understanding” is insufficient for readers to understand if your searching strategy is appropriate.**

Response 2: We thank the reviewer for this comment and added the following sentence: “A search of these databases was conducted using the following terms: “smoking cessation” or “nicotine-replacement therapy”. We also searched the following organizational Web sites: The Japanese Respiratory Society and The Japanese Circulation Society. Randomized trials in which nicotine-replacement therapy (NRT) was compared to placebo or to no treatment, or where different doses of NRT were compared.”.

**Point 3: In order to fit the scope of this journal, I suggest authors add additional paragraph to address the hazardous effect of smoking on respiratory disease, such as COPD, asthma...,etc. Maybe authors can shorten the description of other medical conditions, such as gastro-intestinal disease.**

Response 3: We thank the reviewer for this suggestion. We added the additional paragraph to address the hazardous effect of smoking on respiratory disease.

**Point 4: There are several vague statements repeatedly shown, such as the phrases “abstinence prevalence”. Please have somebody familiar with English grammar and spelling edit the manuscript.**

Response 4: We thank the reviewer for this suggestion. This article was re-edited for English language usage, grammar, spelling and punctuation by one or more native English-speaking editors at Nature Research Editing Service.

#### **Minor**

**Point 1: Provide more updated data about the prevalence of nicotine use in the first paragraph of introduction.**

Response 1: We thank the reviewer for this comment and updated data about the prevalence of nicotine use.

**Point 2: The second paragraph of introduction is too short, and I suggest to combine into the first paragraph.**

Response 2: We thank the reviewer for this suggestion. We combined the second paragraph into the first paragraph.

**Point 3: Cite the reference for the sentence “The World Health Organization (WHO) estimates that, worldwide, tobacco accounts for 9%....”.**

Response 3: We thank the reviewer for this comment. We updated data and cited the reference.

**Point 4: Cite the reference for the sentence “Prochaska et al. proposed a “stage model of behavioral change”....” in the second paragraph of Guidance for smoking cessation.**

Response 4: We thank the reviewer for this comment and cited the reference.

**Point 5: Since your topic is “pharmacological treatments”, I suggest authors should simplify the sentences of psychological intervention at page 8 to 10.**

Response 5: We thank the reviewer for this suggestion and simplified the sentences of psychological intervention at page 8 to 10.

**Point 6: Add “nicotine replacement therapy” at the first abbreviation of “NRT” at page 11.**

Response 6: We thank the reviewer for this comment. We add “nicotine replacement therapy” at the first abbreviation of “NRT” at page 5.

**Point 7: Cite the reference for the sentence “NRT is contraindicated in nonsmokers as well as in people with unstable angina, acute myocardial infarction, severe arrhythmias....” at page 11.**

Response 7: We thank this comment and added the sentence “as attached document shows”.

**Point 8: Cite the reference for the sentence “Side-effects of intraoral problems, sore throat, and stomach pain have....” at page 12.**

Response 8: We thank the reviewer for this comment and cited the reference.

**Point 9: Replace phrase of “smoking desire” into “craving” in the page 12.**

Response 9: We thank the reviewer for this comment. We change “smoking desire” into “craving”.

**Point 10: Again, at page 12, I am confused about the sentence “If the symptoms of acute nicotine addiction appear”. Do you mean “acute nicotine intoxication”?**

Response 10: We thank the reviewer for this comment. We change “If the symptoms of acute nicotine addiction appear” into “If the acute nicotine intoxications appear”.

**Point 11: Add additional paragraph to address the efficacy of nicotine inhaler. It`s also commonly used during clinical practice.**

Response 11: We thank the reviewer for this comment. We added the additional paragraph to address the efficacy of nicotine inhaler.

**Point 12: Cite the reference for the sentence “Bupropion has been approved for the treatment of major depressive disorder and seasonal affective disorder” at page 13.**

Response 12: We thank the reviewer for this comment and cited the reference

## **Response to Reviewer 2 Comments**

**Point 1: Please correct the grammatical and spelling errors throughout the manuscript. Edit the manuscript using Professional services for English language.**

Response 1: We thank the reviewer for this suggestion. This article was re-edited for English language usage, grammar, spelling and punctuation by one or more native Englishspeaking editors at Nature Research Editing Service.

**Point 2: Pharmacotherapies for smoking cessation can be reworded to Pharmacotherapeutic Interventions/Treatments for Smoking cessation**

Response 2: We thank the reviewer for the suggestion. We changed “Pharmacotherapies for smoking cessation” into “Pharmacotherapeutic Interventions/Treatments for Smoking cessation”.
