# Supplementary material for: Current pharmacologic treatments for smoking cessation and new agents undergoing clinical trials
Source: PubMed Central journal article supplement — Ther Adv Respir Dis. 2019 Sep 19;13:1753466619875925. doi: 10.1177/1753466619875925 (PMC6755639; doi:10.1177/1753466619875925), 2019-09-19
Supplement: Reviewer_1_v.2.pdf [file Reviewer_1_v.2.pdf]

Reviewer 1 v.2

Comments to the Author

The revised version of manuscript has been corrected generally according to the reviewer's comments. Therefore, I think it's acceptable for publication.
