# Supplementary material for: Current pharmacologic treatments for smoking cessation and new agents undergoing clinical trials
Source: PubMed Central journal article supplement — Ther Adv Respir Dis. 2019 Sep 19;13:1753466619875925. doi: 10.1177/1753466619875925 (PMC6755639; doi:10.1177/1753466619875925), 2019-09-19
Supplement: Reviewer_2_v.1.pdf [file Reviewer_2_v.1.pdf]

Reviewer 2 v.1

Comments to the Author

Please correct the grammatical and spelling errors throughout the manuscript. Edit the manuscript using Professional services for English language.

Pharmacotherapies for smoking cessation can be reworded to Pharmacotherapeutic Interventions/Treatments for Smoking cessation
